# Supplementary material for: Encapsulation of dyes in metal–organic frameworks and their tunable nonlinear optical properties
Source: Royal Society of Chemistry journal article supplement (doi:10.1039/c5dt03466c), 2015-10-15
Supplement: c5dt03466c1.pdf [file c5dt03466c1.pdf]

## Supporting Information

### **Encapsulation of Dyes in Metal-Organic Frameworks and the Tunable Nonlinear Optical Properties**

*Tao Song, Jiancan Yu, Yuanjing Cui,\* Yu Yang and Guodong Qian\**

State Key Laboratory of Silicon Materials, Cyrus Tang Center for Sensor Materials and Applications, School of Materials Science and Engineering, Zhejiang University, Hangzhou, 310027 (China)

E-mail: cuiyj@zju.edu.cn (Y. Cui); gdqian@zju.edu.cn

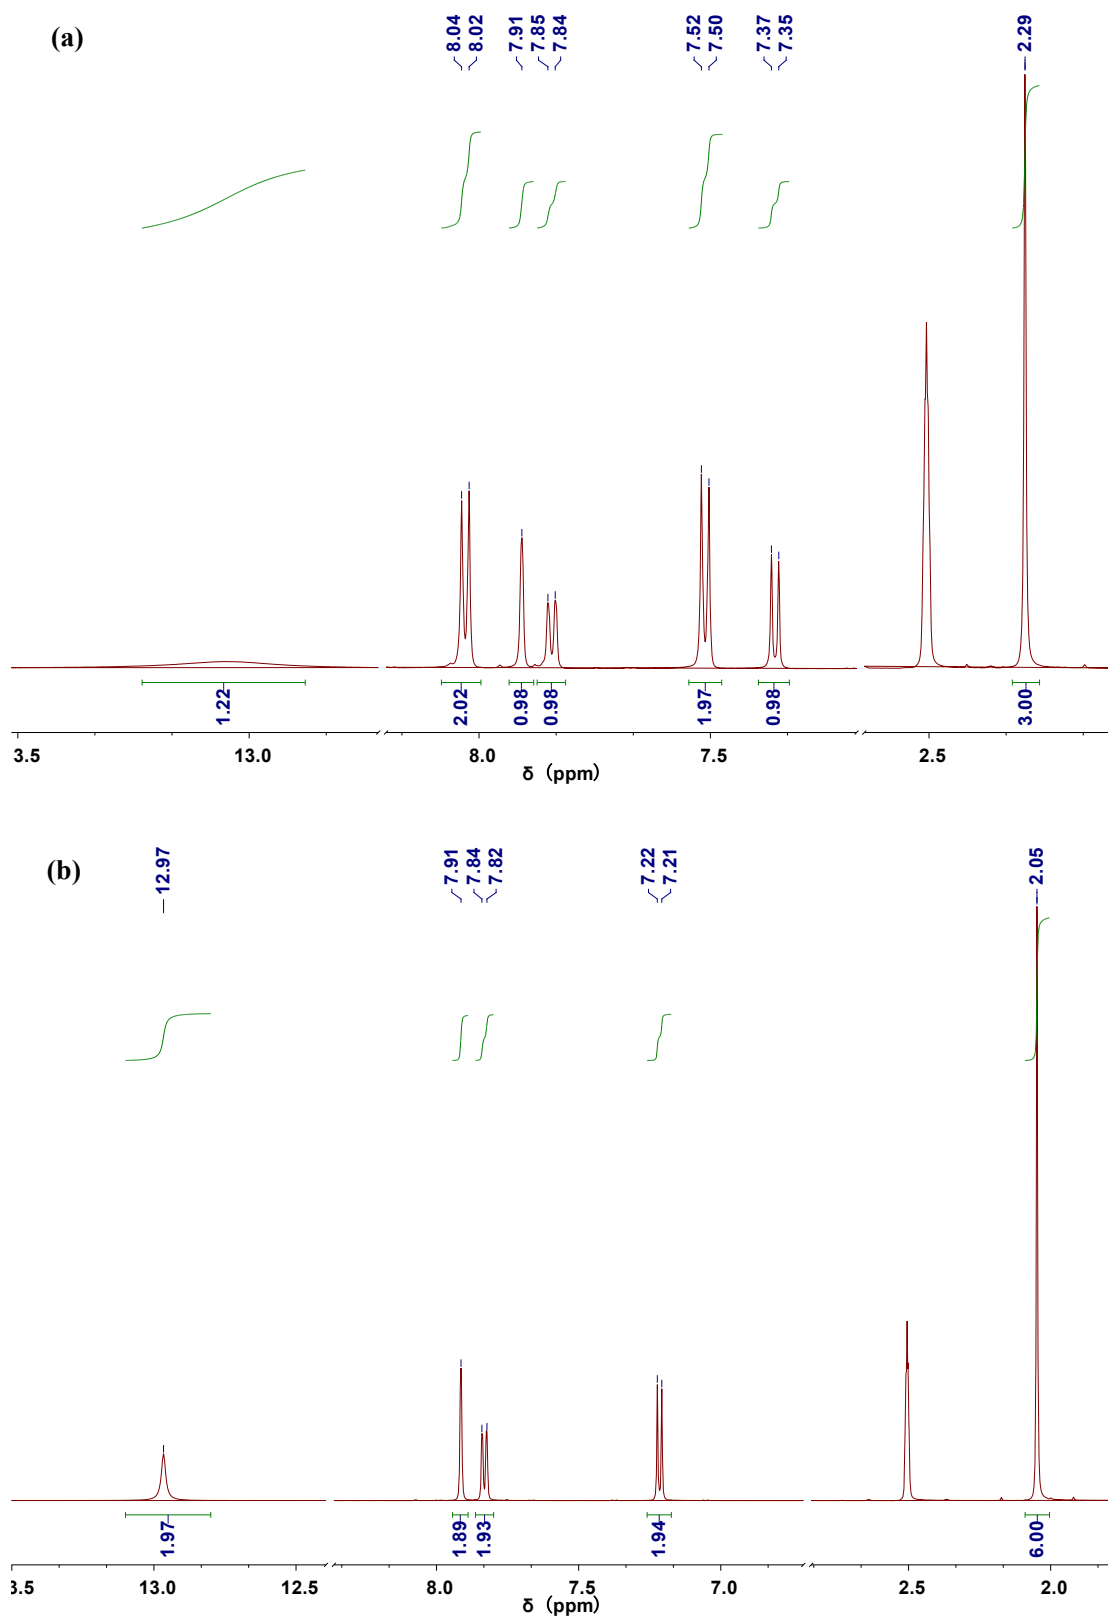

**Figure S1.**  $^1\text{H}$  NMR spectra (500 MHz) of the dye (a) MBPDC and (b) DMBPDC

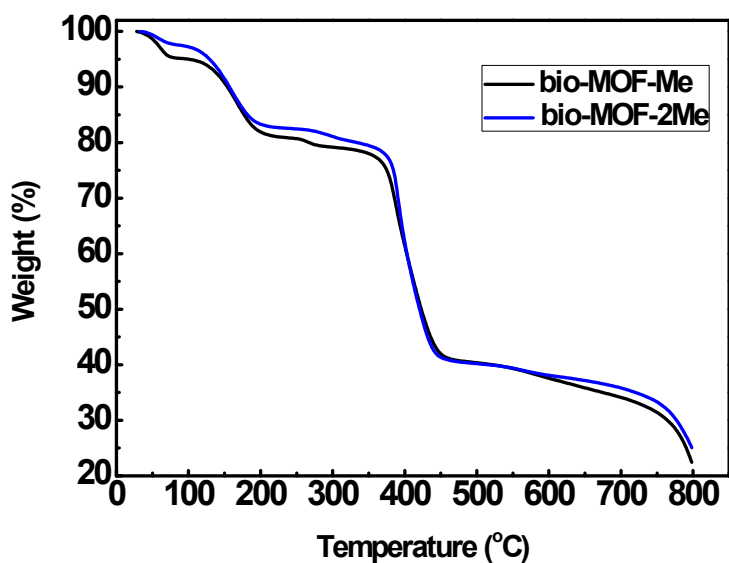

Figure S2. TGA curves of **bio-MOF-Me** and **bio-MOF-2Me**

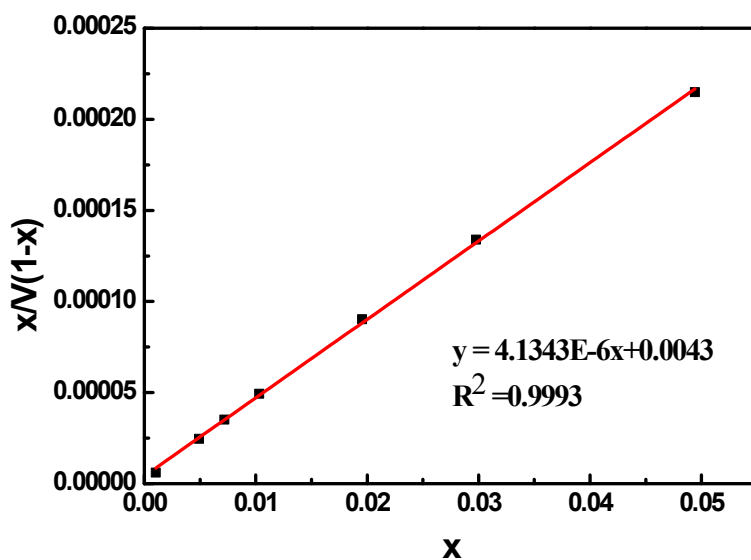

$S_{BET} = 1 / (\text{Slope} + \text{Intercept}) / 22414 \times 6.023 \times 10^{23} \times 0.162 \times 10^{-18} = 1011.4 \text{ m}^2/\text{g}$   
 Figure S3. The BET surface area of **bio-MOF-1** obtained from  $N_2$  adsorption isotherm at 77 K

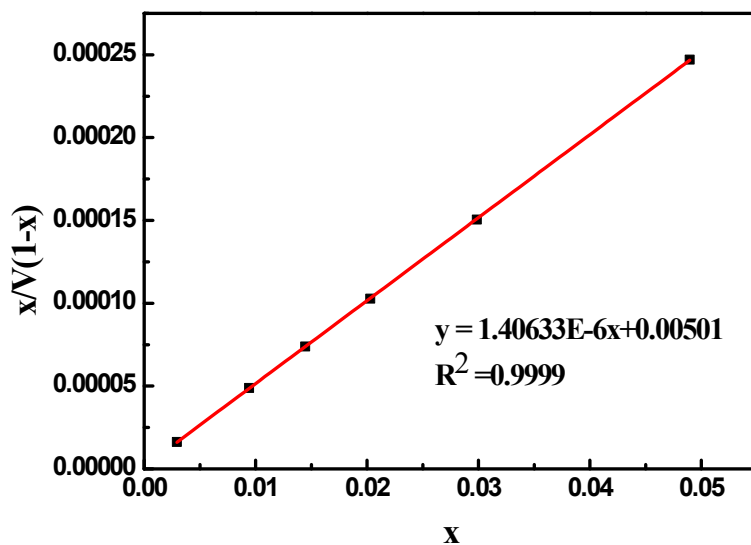

$$S_{\text{BET}} = 1/(\text{Slope} + \text{Intercept}) / 22414 \times 6.023 \times 10^{23} \times 0.162 \times 10^{-18} = 868.7 \text{ m}^2/\text{g}$$

**Figure S4.** The BET surface area of **bio-MOF-Me** obtained from N<sub>2</sub> adsorption isotherm at 77 K

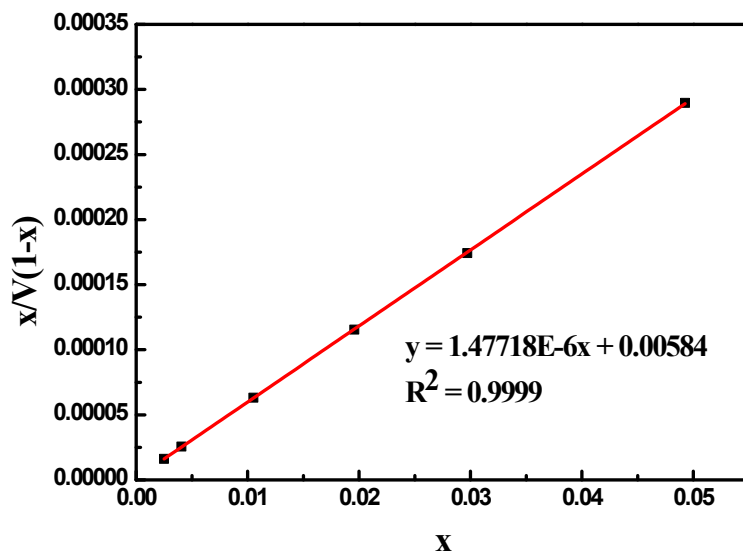

$$S_{\text{BET}} = 1/(\text{Slope} + \text{Intercept}) / 22414 \times 6.023 \times 10^{23} \times 0.162 \times 10^{-18} = 745.2 \text{ m}^2/\text{g}$$

**Figure S5.** The BET surface area of **bio-MOF-2Me** obtained from N<sub>2</sub> adsorption isotherm at 77 K

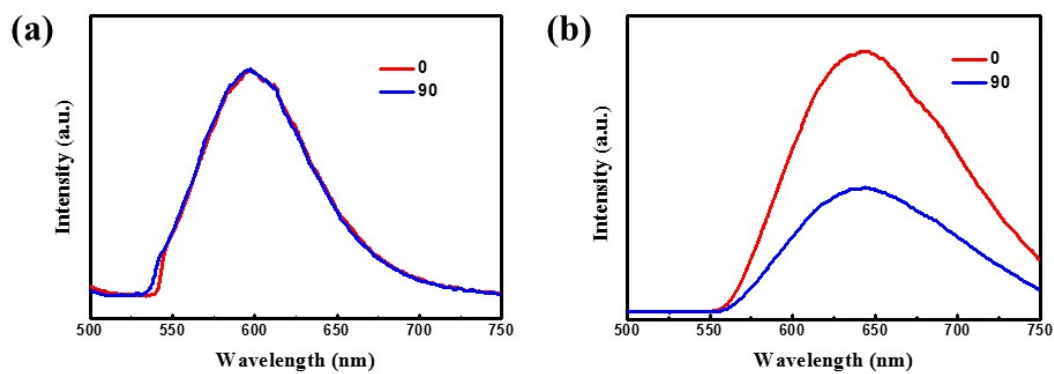

**Figure S6.** Polarized fluorescence spectra of (a) bio-MOF-1 $\supset$ DM-1 and (b) bio-MOF-1 $\supset$ DP-1

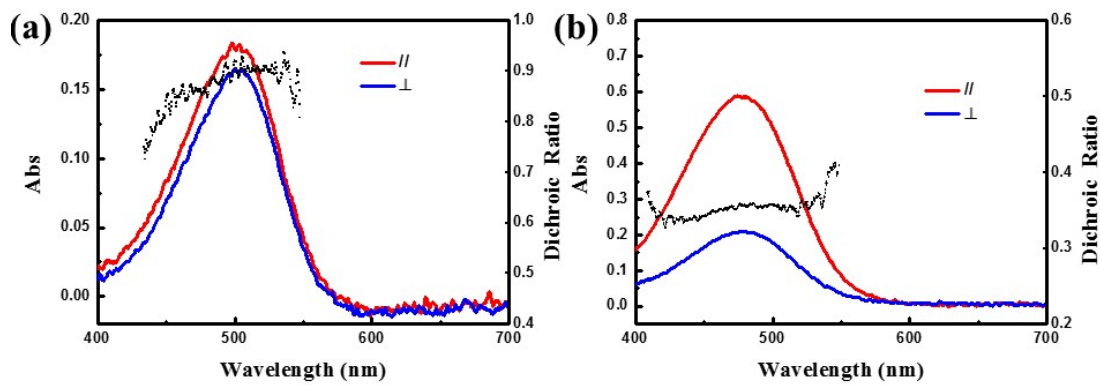

**Figure S7.** The polarized absorption spectra of (a) bio-MOF-1 $\supset$ DM-1 and (b) bio-MOF-1 $\supset$ DP-1, and the corresponding dichroic ratio (black dots).

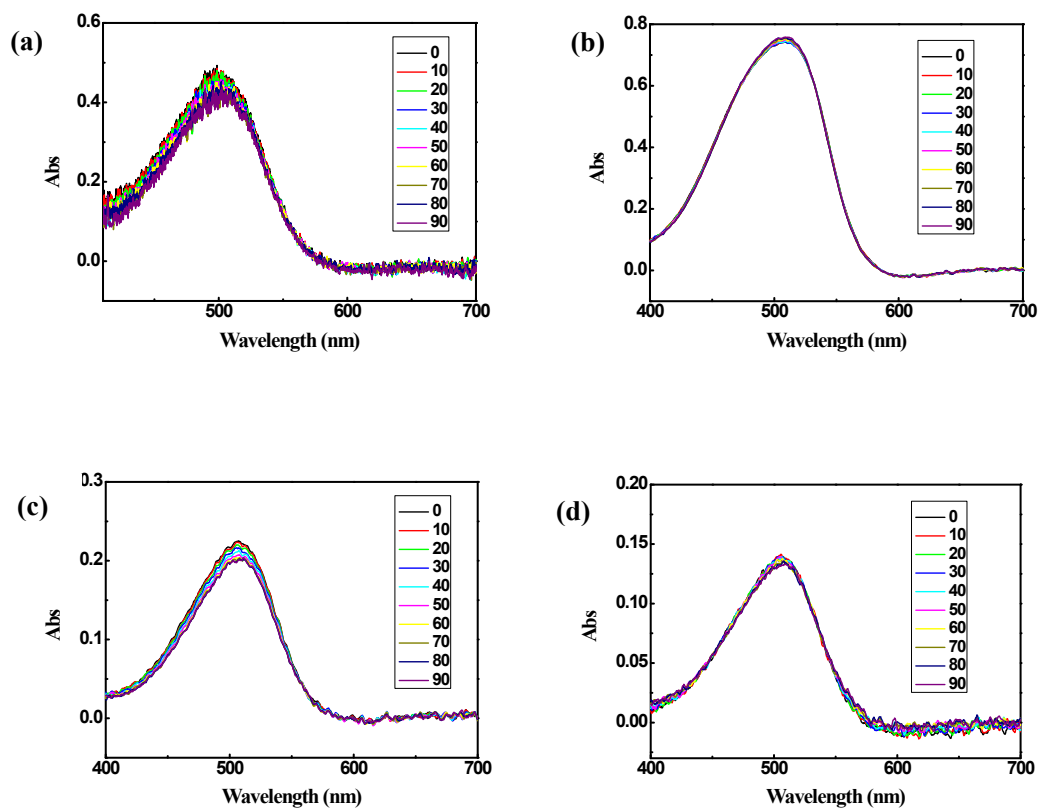

**Figure S8.** Polarized absorption spectra of (a) **bio-MOF-1⊃DM-1**, (b) **bio-MOF-1⊃DM-4**, (c) **bio-MOF-1⊃DM-7** and (d) **bio-MOF-1⊃DM-7**. The legend means the angle between the polarizer and the long axis of crystal

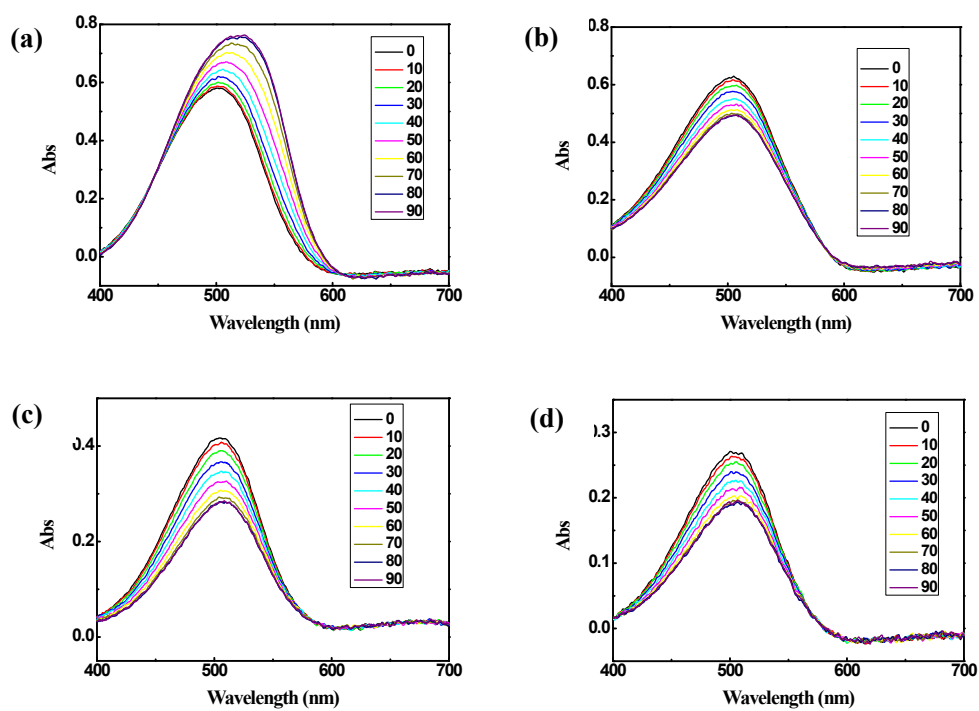

**Figure S9.** Polarized absorption spectra of (a) **bio-MOF-MeDM-1**, (b) **bio-MOF-MeDM-4**, (c) **bio-MOF-MeDM-7** and (d) **bio-MOF-MeDM-7**.

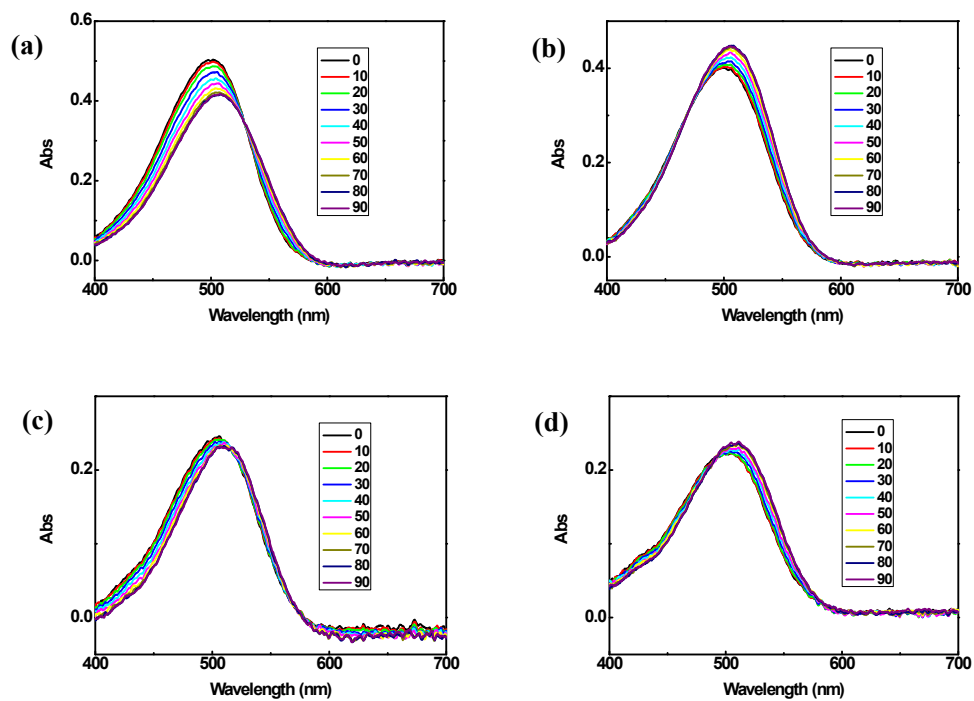

**Figure S10.** Polarized absorption spectra of (a) **bio-MOF-2Me⊃DM-1**, (b) **bio-MOF-2Me⊃DM-4**, (c) **bio-MOF-2Me⊃DM-7** and (d) **bio-MOF-2Me⊃DM-7**.



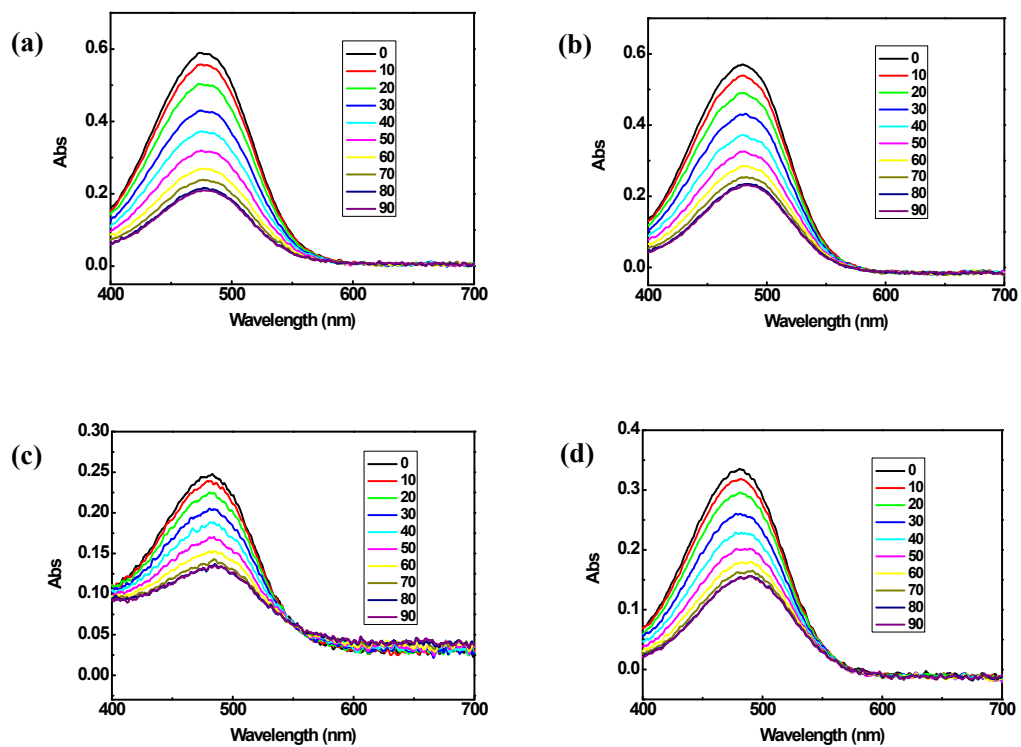

**Figure S11.** Polarized absorption spectra of (a) **bio-MOF-1 $\supset$ DP-1**, (b) **bio-MOF-1 $\supset$ DP-4**, (c) **bio-MOF-1 $\supset$ DP-7** and (d) **bio-MOF-1 $\supset$ DP-7**.

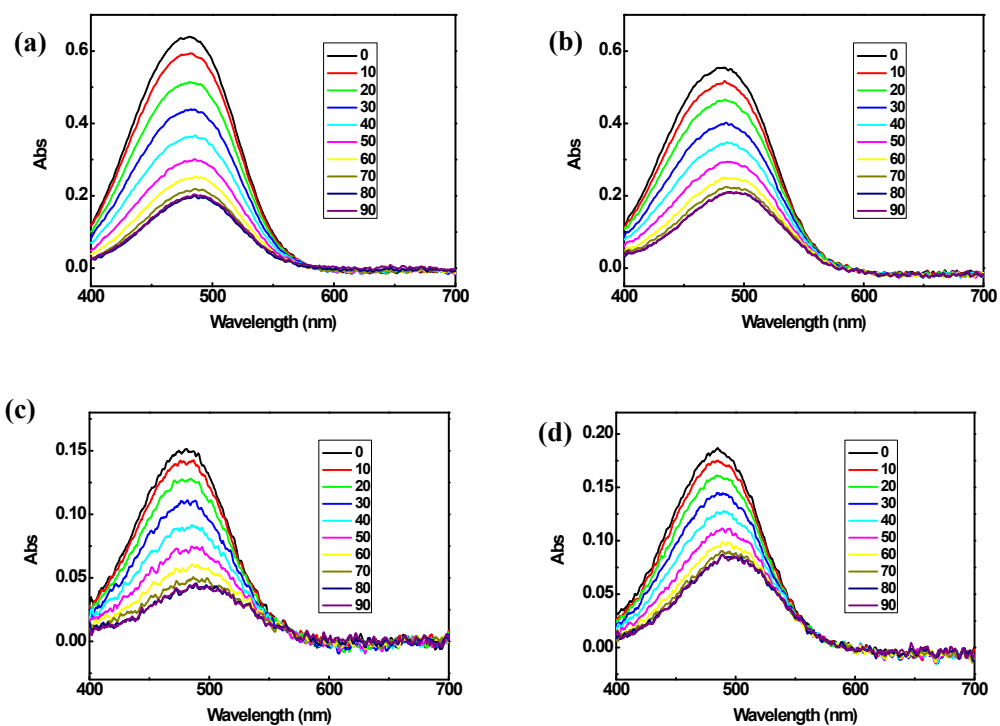

**Figure S12.** Polarized absorption spectra of (a) **bio-MOF-MeDP-1**, (b) **bio-MOF-MeDP-4**, (c) **bio-MOF-MeDP-7** and (d) **bio-MOF-MeDP-7**.

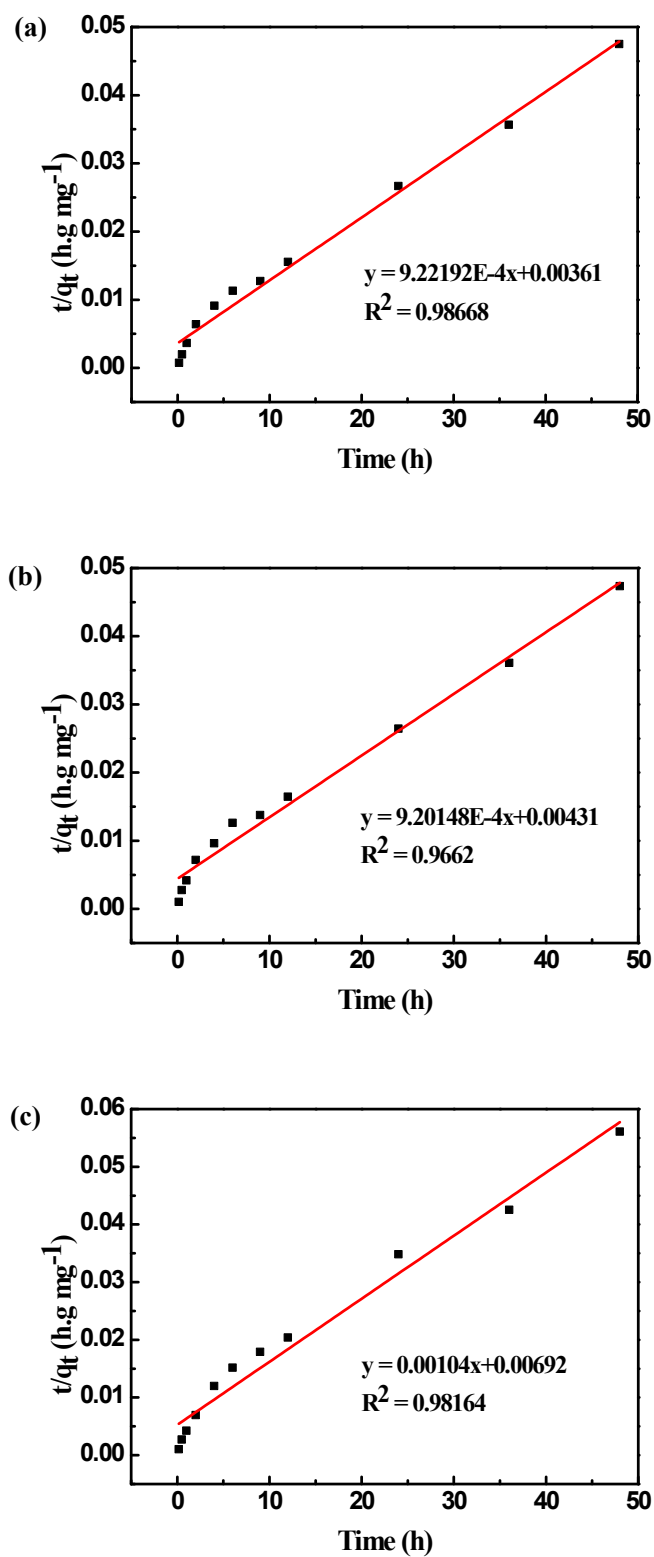

**Figure S13.** Effect of reaction time (the right one describes the pseudo-second-order kinetic) on DM-1 adsorption onto (a) bio-MOF-1, (b) bio-MOF-Me and (c) bio-MOF-2Me

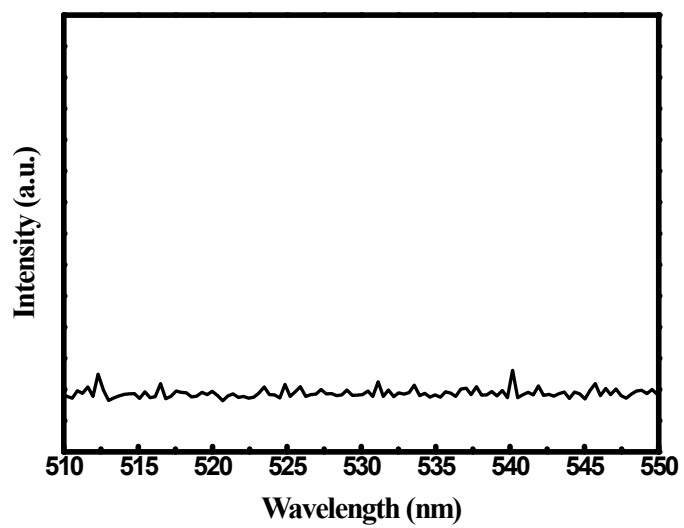

**Figure S14.** SHG spectra of DM-1 crystals
